# Supplementary material for: The fate of 15 N-nitrate in mesocosms from five European peatlands differing in long-term nitrogen deposition rate
Source: Copernicus journal article supplement (doi:10.5194/bg-13-707-2016), 2016-02-04
Supplement: Supplementary file 1 [file bg-13-707-2016-supplement.pdf]

Supplement of Biogeosciences, 13, 707–722, 2016  
<http://www.biogeosciences.net/13/707/2016/>  
doi:10.5194/bg-13-707-2016-supplement  
© Author(s) 2016. CC Attribution 3.0 License.

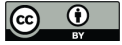

Biogeosciences  Open Access

*Supplement of*

## **The fate of $^{15}\text{N}$ -nitrate in mesocosms from five European peatlands differing in long-term nitrogen deposition rate**

**K. Zając and C. Blodau**

*Correspondence to:* C. Blodau ([christian.blodau@uni-muenster.de](mailto:christian.blodau@uni-muenster.de))

The copyright of individual parts of the supplement might differ from the CC-BY 3.0 licence.

### Soil moisture (SM) sensors calibration procedure

Calibration was performed on the studied peat monoliths ('mesocosms') after termination of the experiment. Each peat core, which had been equipped with SM sensors during the experiment, was divided into two parts – the top and the bottom. From each part smaller peat cores (0.12 m in diameter, 0.1 m high) were removed and placed in thin-walled, rigid PVC tubes. Peat cores were saturated and dried successively – first at air temperature for 40 days and subsequently at 70°C in the oven until no further decrease in mass was observed. The peat mass and the soil moisture content were recorded every 1 to 5 days, starting at the saturation state and finishing after oven drying. The calibration curves were established for the top and the bottom part of the mesocosms, for each site specifically. Due to the big variability between the absolute sensor readings we used relative delta values for the calculations (a difference between the highest reading recorded by the sensor, i.e. at 100% saturation and the current reading). Later, the delta values were transferred back to the absolute volumetric water content (VWC) values.

Obtained calibration curves were mainly polynomial and had a regression coefficient of  $R^2 > 0.82$ :

|                       |                                    |              |
|-----------------------|------------------------------------|--------------|
| Degerö Stormyr top    | $y = -8E-07x^2 + 0.0019x + 0.0367$ | $R^2 = 0.99$ |
| Degerö Stormyr bottom | $y = 6E-06x^2 + 0.0003x + 0.0185$  | $R^2 = 0.83$ |
| Cors Fochno top       | $y = 2E-06x^2 + 0.0007x - 0.0118$  | $R^2 = 0.90$ |
| Cors Fochno bottom    | $y = 0.002x + 0.0974$              | $R^2 = 0.89$ |
| Whixall Moss top      | $y = -2E-06x^2 - 0.002x + 0.0871$  | $R^2 = 0.91$ |
| Whixall Moss bottom   | $y = 2E-06x^2 + 0.0008x - 0.0347$  | $R^2 = 0.93$ |

|                                     |                                    |              |
|-------------------------------------|------------------------------------|--------------|
| Lille Vildmose top                  | $y = 0.002x + 0.0109$              | $R^2 = 0.94$ |
| Lille Vildmose bottom               | $y = 4E-06x^2 + 0.001x + 0.0099$   | $R^2 = 0.93$ |
| Frölichshaier Sattelmoor top/bottom | $y = -2E-06x^2 + 0.0024x + 0.0789$ | $R^2 = 0.99$ |

The sensor readings were highest not at the expected 100% saturation (first reading) but during second or third measurement (2-4 days later). This effect may have been caused by the differences in the dielectric constant values ( $\epsilon$ ) of air and peat.

Variable peat structure and porosity within one peat core might have led to deviations in sensor readings. Such an effect was also suggested by Nagare et al. (2011), where it was argued that an increased volumetric fraction of air at greater porosities is the main cause for the deviation from  $\epsilon$ -VWC relationships of soils at similar water contents.

Nagare R.M., Schincariol R.A., Quinton W.L., Hayashi M., 2011: Laboratory calibration of time domain reflectometry to determine moisture content in undisturbed peat samples. *European Journal of Soil Science* 62:505-515

Table S1. Total aboveground biomass, *Sphagnum* growth rate, bulk density (0-20 cm depth) and volumetric water content (0-15 cm depth) of the investigated sites. *Sphagnum* biomass calculated for the 5 cm thick layer. Standard deviations are given.

| Site | Total aboveground biomass (g m <sup>-2</sup> ) |          |            | <i>Sphagnum</i> growth<br>(mm month <sup>-1</sup> ) | Peat Density<br>(g cm <sup>-3</sup> ) | VWC<br>(cm <sup>-3</sup> cm <sup>-3</sup> ) |
|------|------------------------------------------------|----------|------------|-----------------------------------------------------|---------------------------------------|---------------------------------------------|
|      | <i>Sphagnum</i>                                | Shrubs   | Graminoids |                                                     |                                       |                                             |
| DS   | 1117 ± 245                                     | 55 ± 14  | 110 ± 62   | 1.0 ± 0.2                                           | 0.044 ± 0.008                         | 0.897                                       |
| CF   | 1196 ± 220                                     | 260 ± 96 | 97 ± 38    | 0.4 ± 0.5                                           | 0.049 ± 0.008                         | 0.804                                       |
| WM   | 682 ± 54                                       | 273 ± 81 | 39 ± 18    | 0.3 ± 0.1                                           | 0.045 ± 0.016                         | 0.642                                       |
| LV   | 1089 ± 339                                     | 124 ± 48 | 41 ± 7     | 0.6 ± 0.05                                          | 0.041 ± 0.021                         | 0.924                                       |
| FS   | 754 ± 48                                       | 359 ± 85 | 92 ± 119   | 2.3 ± 1.3                                           | 0.042 ± 0.006                         | 0.748                                       |

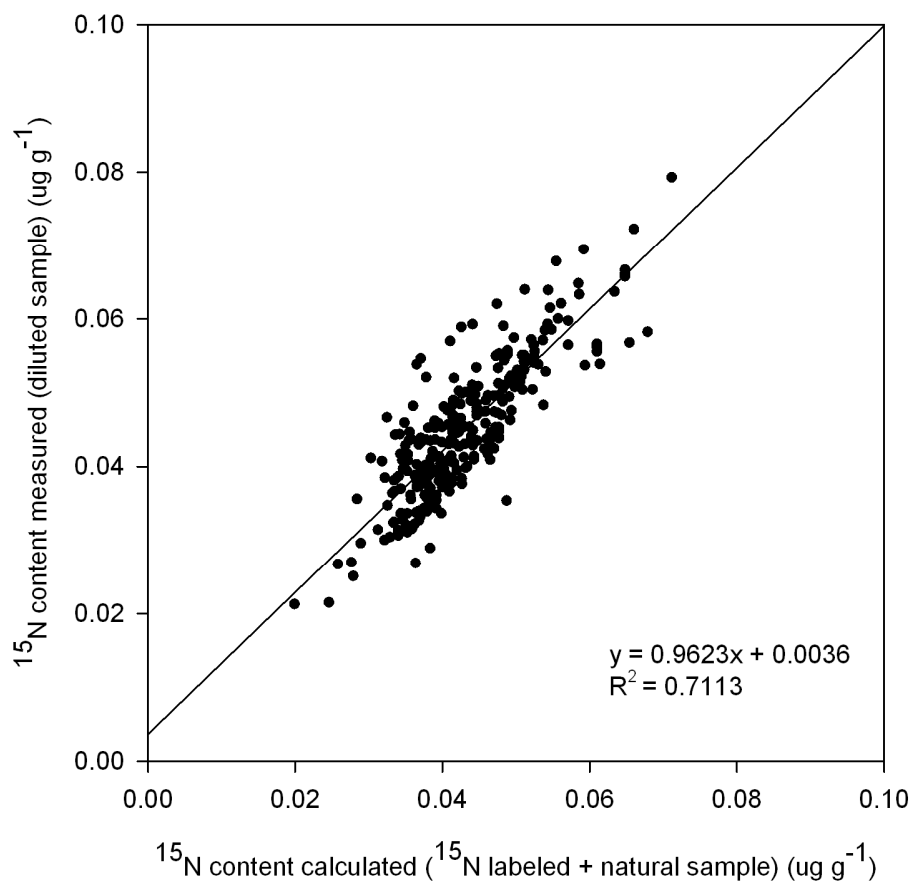

Figure S1. Correlation between recalculated  $^{15}\text{N}$  content measured in a labeled and not-labeled sample ( $^{15}\text{N}$  labeled + natural sample) and  $^{15}\text{N}$  content in a measured diluted sample. Pearson's correlation coefficient  $r = 0.845$ , coefficient of determination  $R^2 = 0.71$ .

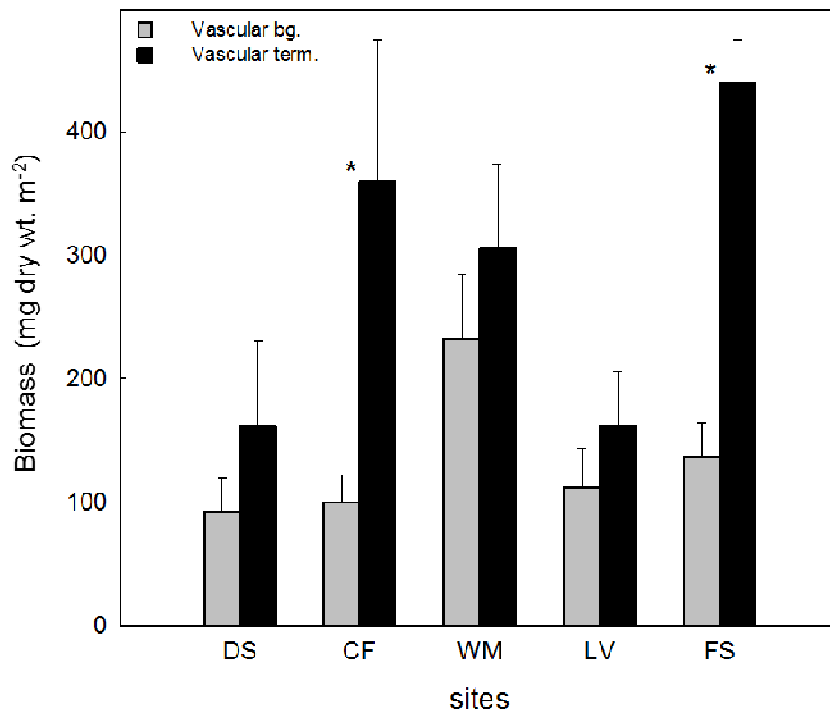

Figure S2. Initial and final total vascular plant biomass. Vascular bg. = total vascular plant biomass at the start of the experiment collected from hollow plots located in the close vicinity of the sampling spots; Vascular term. = total vascular plant biomass at the end of the experiment sampled from the cores. Site abbreviations as in Figure 1. Asterisk (\*) indicates significant differences ( $P < 0.05$ ) between start and end of the experiment, as described above. Site abbreviations: DS – Degerö Stormyr, CF – Cors Fochno, WM – Whixall Moss, LV – Lille Vildmose, FS – Frölichshaier Sattelmoor

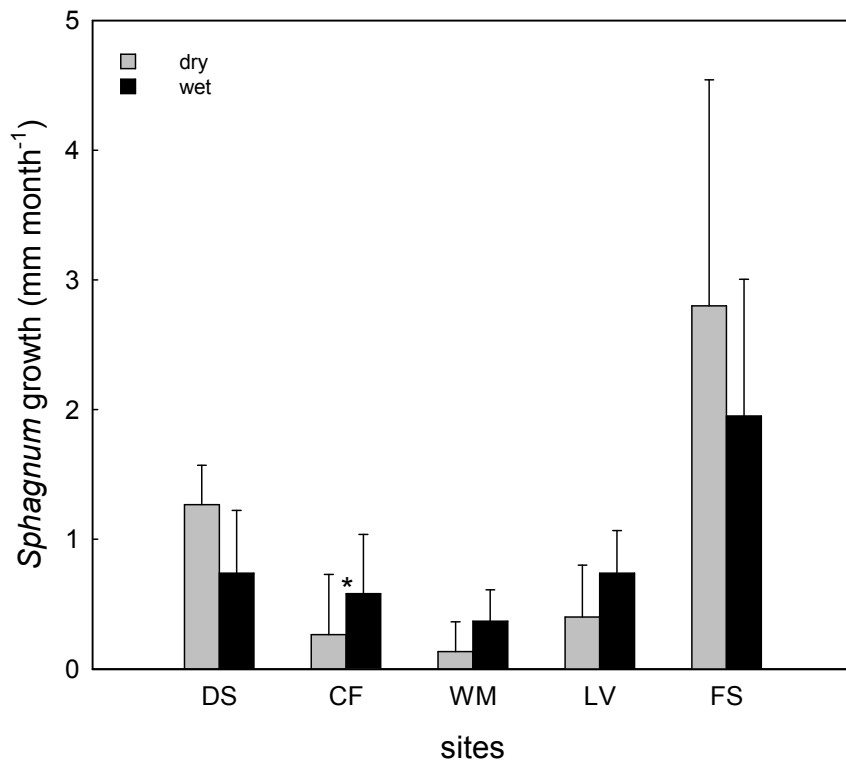

Figure S3. *Sphagnum* growth during dry and wet period. Site abbreviations as in Figure 1. Asterisk (\*) indicates significant difference ( $P < 0.02$ ). Site abbreviations: DS – Degerö Stormyr, CF – Cors Fochno, WM – Whixall Moss, LV – Lille Vildmose, FS – Frölichshaier Sattelmoor.

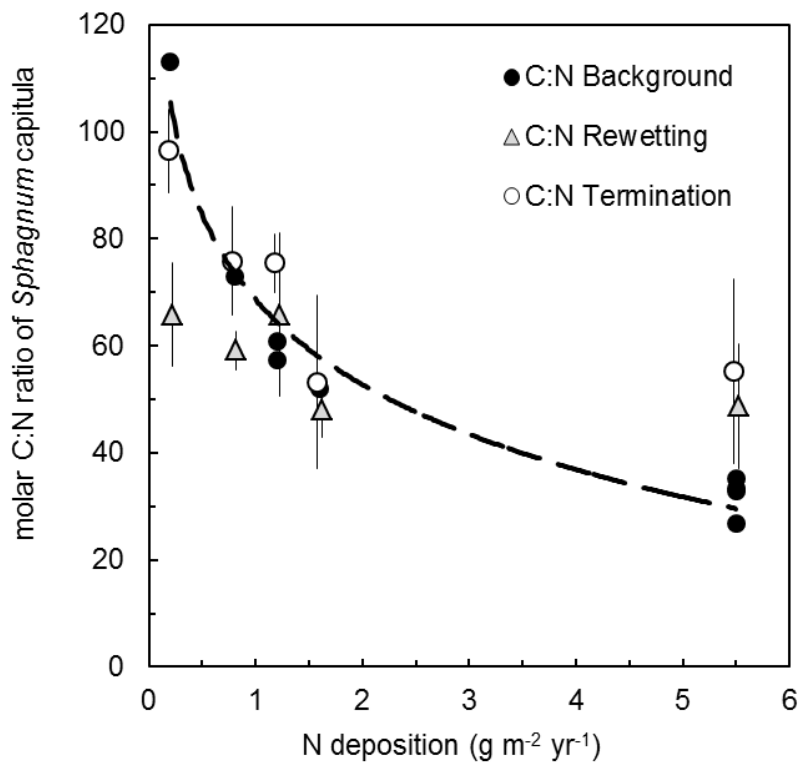

Figure S4. Ratios of C/N in *Sphagnum* capitula (panel A) at the site ('Background'), at the end of the dry period ('Rewetting'), and at the end of the experiment ('Termination'). The trend line describes molecular C/N as function of long-term N deposition ( $C/N = -22.9 \cdot \ln(N_{dep}) + 68.6$ ;  $R^2 = 0.96$ ).

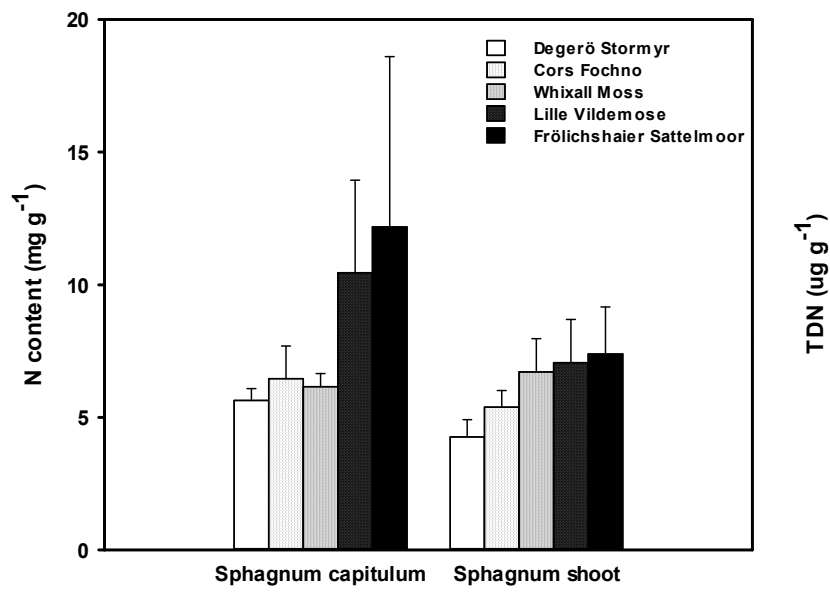

Figure S5. Nitrogen content (mean  $\pm$  SD, n = 3) of *Sphagnum* capitulum and stem (dry wt.).



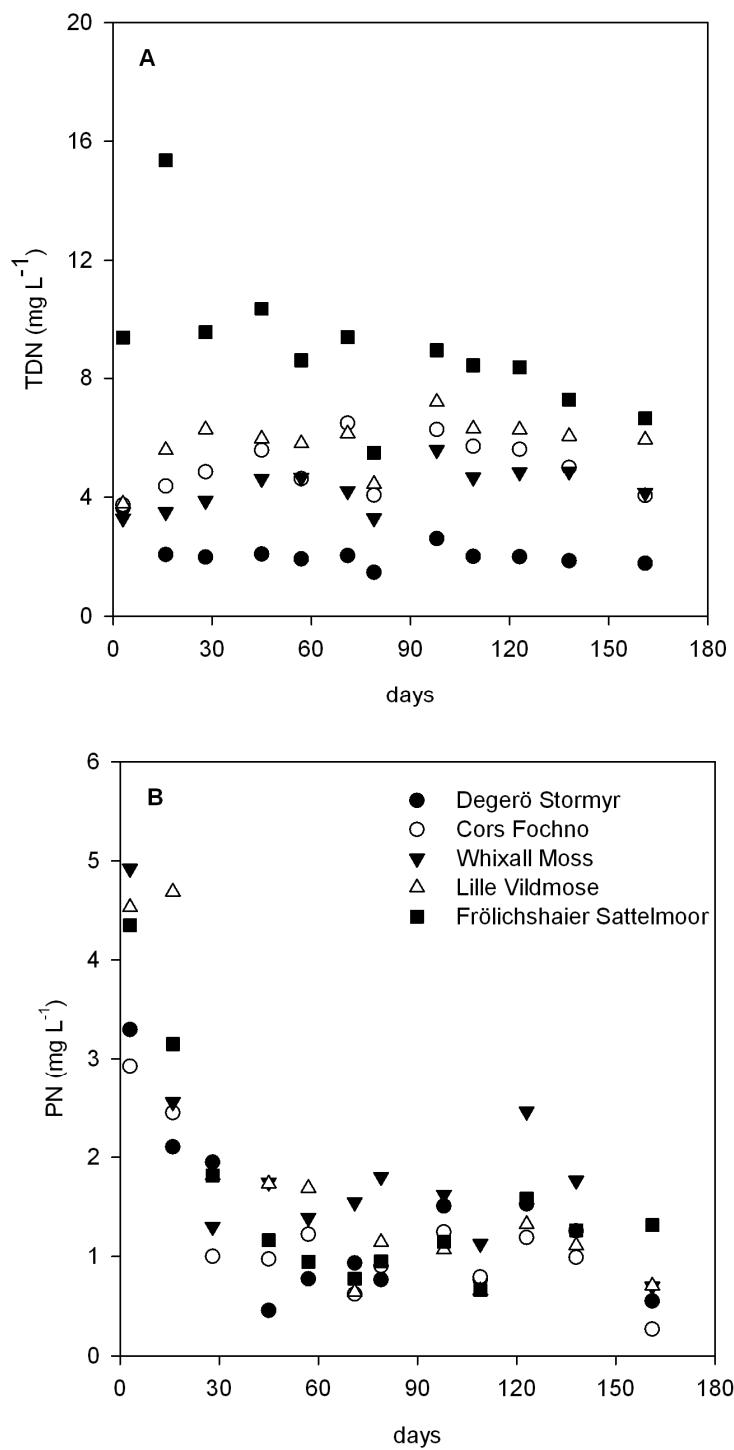

Figure S6. (A) Total dissolved nitrogen (TDN) concentration ( $\text{mg L}^{-1}$ ) for the sites (4 measuring depths pulled together) and (B) particulate nitrogen (PN) content ( $\text{mg L}^{-1}$ ) measured at the bottom outlet of the cores.
